# Supplementary material for: Borylation, silylation and selenation of C–H bonds in metal sandwich compounds by applying a directing group strategy
Source: Royal Society of Chemistry journal article supplement (doi:10.1039/c7nj02388j), 2017-01-01
Supplement: c7nj02388j1.pdf [file c7nj02388j1.pdf]

## Supplementary Information

### **Borylation, silylation and selenation of C-H bonds in metal sandwich compounds by applying a directing group strategy**

Mayukh Deb, Jatinder Singh, Shuvadip Mallik, Susanta Hazra and Anil J Elias\*

*Department of Chemistry, Indian Institute of Technology Delhi, Hauz Khas, New Delhi-110016.*

*Email: [eliasanil@gmail.com](mailto:eliasanil@gmail.com)*

## Contents

|                                                                                   |     |
|-----------------------------------------------------------------------------------|-----|
| 1. General information (A).....                                                   | S3  |
| 2. General procedure for cobalt sandwich compounds with directing groups (B)..... | S4  |
| 3. General procedure for ferrocene compounds with directing groups (C) .....      | S6  |
| 4. General procedures for the formation of palladacycles (D).....                 | S7  |
| 5. Optimization of standard conditions for C-H borylation (E).....                | S8  |
| 6. Synthesis of the mono C-H selenated cobalt sandwich compound (F) .....         | S11 |
| 7. Synthesis of bis C-H selenated ferrocene compound (G) .....                    | S12 |
| 8. X-ray crystallographic data of the compounds (H) (Table- S7-S10).....          | S14 |
| 9. Selected Bond-lengths and bond-angles (I).....                                 | S18 |
| 10. References (J).....                                                           | S22 |

## A. General information:

All reactions were carried out under pure nitrogen following Schlenk-line techniques. Solvents were dried under suitable drying agents such as toluene on sodium/ benzophenone, and CH<sub>2</sub>Cl<sub>2</sub> on dry phosphorus pentoxide. All compounds were purified by column chromatography using silica-gel of 60-120 mesh. <sup>1</sup>H and <sup>13</sup>C {<sup>1</sup>H} spectra were recorded on a Bruker Spectrospin DPX-300 NMR spectrometer at 300 and 75.4 MHz respectively. CDCl<sub>3</sub> was the solvent utilized for NMR studies unless otherwise specified. Elemental analyses were carried out on a Carlo Erba CHNSO 1108 elemental analyzer. Suitable crystals of the compounds were obtained by slow evaporation of their saturated solutions in suitable solvent mixtures and using diffusion method. Single-crystal diffraction studies were carried out on a Bruker SMART APEX CCD diffractometer and Bruker D8 Quest CMOS diffractometer with a Mo K $\alpha$  ( $\lambda=0.71073$  Å) sealed tube. The data frames were collected using the program APEX3 and processed using the program SAINT routine in APEX3. The structures were solved by direct methods and refined by the full-matrix least-squares on F<sup>2</sup> using the SHELXTL-2014/7 program.<sup>1-3</sup> All hydrogen atoms were included in idealized positions, and a riding model was used. Hydrogen atoms on hetero-atoms were located using Fourier map, except for **2b** and **9**. In these two cases we could not locate the H-atoms on hetero-atoms using Fourier map and had to affix them at their calculated positions using riding model following the common practice. Non-hydrogen atoms were refined with anisotropic displacement parameters. All reactions were standardized first on the cobalt sandwich derivative ( $\eta^5$ -Cp)Co(C<sub>4</sub>Ph<sub>4</sub>). Only fruitful reactions were extended to ferrocene derivatives.

**B. General procedure for introducing different directing groups on the cobalt sandwich compound ( $\eta^5\text{-Cp}$ )Co( $\text{C}_4\text{Ph}_4$ ) with carboxamide linkers:**

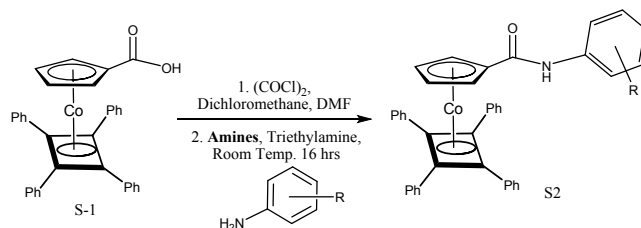

**Scheme S1:** Introduction of directing groups on cobalt sandwich compounds

$\{(\eta^5\text{-C}_5\text{H}_4)\text{-COOH}\}\text{Co}(\eta^4\text{-C}_4\text{Ph}_4)$  1g (1.9 mmol) was dissolved in dichloromethane. Oxalyl chloride (1.21g, 0.817mL, 9.53 mmol, 5 equiv) was added to it. 2 drops of *N,N*-dimethylformamide was added as catalyst. The reaction mixture was stirred for 1 hour at room temperature. The acid chloride formed was evaporated under reduced pressure under a nitrogen atmosphere. The acid chloride solution was added to a solution of amine along with triethylamine (10mL) and DCM, by solubilising it in DCM. This reaction mixture was stirred for 16 hours at room temperature. The product formed was washed with saturated  $\text{NaHCO}_3$  solution followed by brine using a separatory funnel; the organic part was dried over anhydrous  $\text{Na}_2\text{SO}_4$  and was purified by column chromatography using active neutral alumina.

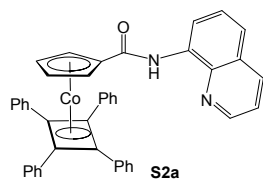

**S2a:** Prepared according to known literature procedure.<sup>4</sup> The characterization data exactly matches with the literature values.

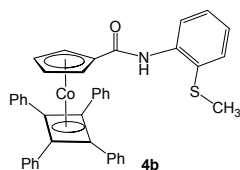

**4b:** M.P.:201°-203°C, Yield (73%). Anal. Found: C, 76.15; H, 5.18; N, 2.11. Calcd for  $\text{C}_{41}\text{H}_{32}\text{CoNOS}$ : C, 76.26; H, 5.00; N, 2.17.  $^1\text{H}$ NMR ( $\text{CDCl}_3$ ):  $\delta$  8.33 [1H, s, N-*H*],  $\delta$  8.14-8.12 [1H, d, Ph-*H*],  $\delta$  7.45-7.41 [10H, m, Ph-*H*],  $\delta$  7.35-7.13 [12H, m, Ph-*H*],  $\delta$  6.99-6.95 [1H, d, Ph-*H*],  $\delta$  5.21 [2H, Cp*H*],  $\delta$  4.82 [2H, Cp*H*],  $\delta$  2.20 [3H, SCH<sub>3</sub>].  $^{13}\text{C}\{^1\text{H}\}$ ( $\text{CDCl}_3$ ):  $\delta$  162.80 (C=O),  $\delta$  138.99-119.86 (PhC), 91.11-82.54 (CpC), 76.62 (CbC), 19.25 (SCH<sub>3</sub>). HRMS: Calc.  $m/z$  for  $\text{C}_{41}\text{H}_{33}\text{CoNOS}$  [ $\text{M}+\text{H}$ ]<sup>+</sup> 646.1609; Found: 646.1608.

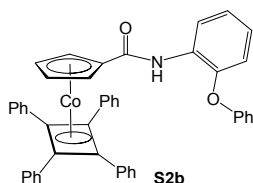

**S2b:** M.P.: 177°-181°C, Yield (78%). Anal. Found: C, 79.75; H, 5.02; N, 2.07. Calcd for  $C_{46}H_{34}CoNO_2$ : C, 79.87; H, 4.95; N, 2.02.  $^1H$ NMR ( $CDCl_3$ ):  $\delta$  8.23 [1H, s, N-H],  $\delta$  7.58-7.27 [12H, m, Ph-H],  $\delta$  7.17-7.01 [13H, m, Ph-H],  $\delta$  6.98-6.79 [5H, m, Ph-H],  $\delta$  5.05 [2H, CpH],  $\delta$  4.80 [2H, CpH].  $^{13}C\{^1H\}$ ( $CDCl_3$ ):  $\delta$  162.75 (C=O),  $\delta$  144.87-117.36 (PhC), 85.87-82.66 (CpC), 76.50 (CbC). HRMS: Calc. m/z for  $C_{46}H_{34}CoNNaO_2$   $[M+Na]^+$  714.1813; Found: 714.1814

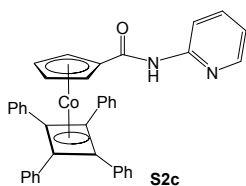

**S2c:** M.P.: Decomp. above 155°C, Yield (65%). Anal. Found: C, 78.10; H, 4.82; N, 4.60. Calcd for  $C_{39}H_{29}CoN_2O$ : C, 77.99; H, 4.87; N, 4.66.  $^1H$ NMR ( $CDCl_3$ ):  $\delta$  8.21-8.19 [1H, s, N-H],  $\delta$  7.93-7.90 [1H, m, Ph-H],  $\delta$  7.61 [1H, m, Ph-H],  $\delta$  7.48-7.41 [8H, m, Ph-H],  $\delta$  7.25-6.98 [14H, m, Ph-H],  $\delta$  5.25 [2H, CpH],  $\delta$  4.87 [2H, CpH].  $^{13}C\{^1H\}$ ( $CDCl_3$ ):  $\delta$  162.59 (C=O),  $\delta$  151.46-113.96 (PhC), 89.83-82.67 (CpC), 76.64 (CbC). HRMS: Calc. m/z for  $C_{39}H_{30}CoN_2O$   $[M+H]^+$  601.1684; Found: 601.1671

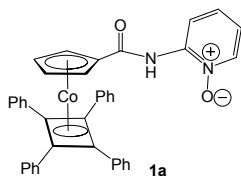

**1a:** M.P.: Above 220°C, Yield (75%). Anal. Found: C, 75.90; H, 4.78; N, 4.57. Calcd for  $C_{39}H_{29}CoN_2O_2$ : C, 75.97; H, 4.74; N, 4.54.  $^1H$ NMR ( $CDCl_3$ ):  $\delta$  9.85 [1H, s, N-H],  $\delta$  8.19-8.16 [1H, dd, Ph-H],  $\delta$  8.06-8.02 [1H, m, Ph-H],  $\delta$  7.52-7.42 [8H, m, Ph-H],  $\delta$  7.52-7.42 [8H, m, Ph-H],  $\delta$  7.25-7.11 [13H, m, Ph-H],  $\delta$  5.30-5.29 [2H, CpH],  $\delta$  4.91-4.90 [2H, CpH].  $^{13}C\{^1H\}$ ( $CDCl_3$ ):  $\delta$  163.22 (C=O),  $\delta$  144.18-114.59 (PhC), 89.06, 86.84, 83.09 (CpC), 76.61 (CbC), 19.25 (SCH<sub>3</sub>). HRMS: Calc. m/z for  $C_{39}H_{29}CoN_2NaO_2$   $[M+Na]^+$  639.1453; Found: 639.1473.

**C. General procedure for introducing different directing groups on ferrocene with carboxamide linkers:**

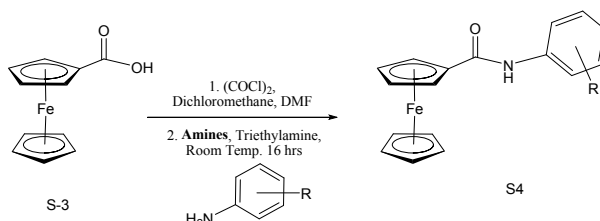

**Scheme S2:** Introduction of directing groups on ferrocene.

$[(\eta^5\text{-C}_5\text{H}_4\text{-COOH})\text{Fe}(\text{C}_5\text{H}_5)]$  1g (4.34 mmol) was dissolved in dichloromethane, Oxalyl chloride 1.65g, 1.19 mL (13.04 mmol, 3 equiv) was added to it. 2 drops of *N,N*-dimethylformamide was added as catalyst. The reaction mixture was stirred for 1 hour at room temperature. The acid chloride formed was evaporated under reduced pressure under nitrogen atmosphere. The acid chloride solution was added to a solution of amine with triethylamine 10mL and DCM, by solubilising it in DCM. This reaction mixture was stirred for 16 hours at room temperature. The product formed was washed with saturated  $\text{NaHCO}_3$  solution followed by brine using a separatory funnel and the organics were dried over anhydrous  $\text{Na}_2\text{SO}_4$  and was purified by column chromatography using active neutral alumina.

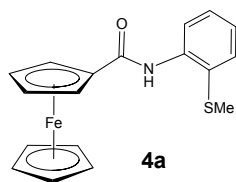

**4a:** M.P.: Decomp. at  $132^\circ\text{C}$ , Yield (71%). Anal. Found: C, 62.70; H, 4.78; N, 3.93. Calcd for  $\text{C}_{39}\text{H}_{29}\text{CoN}_2\text{O}$ : C, 61.55; H, 4.88; N, 3.99.  $^1\text{H}$ NMR ( $\text{CDCl}_3$ ):  $\delta$  8.81 [1H, s, N-H],  $\delta$  8.48-8.46 [1H, d, Ph-H],  $\delta$  7.56-7.53 [1H, m, Ph-H],  $\delta$  7.35 [1H, m, Ph-H],  $\delta$  7.10-7.09 [1H, m, Ph-H],  $\delta$  4.85 [2H, CpH],  $\delta$  4.46 [2H, CpH],  $\delta$  4.29-4.23 [5H, CpH],  $\delta$  2.48 [3H, SCH<sub>3</sub>].  $^{13}\text{C}\{^1\text{H}\}(\text{CDCl}_3)$ :  $\delta$  168.75 (C=O),  $\delta$  139.27-114.05 (PhC), 71.01-68.34 (CpC), 19.14 (SCH<sub>3</sub>). HRMS: Calc.  $m/z$  for  $\text{C}_{18}\text{H}_{18}\text{FeNOS} [\text{M}+\text{H}]^+$  352.0453; Found: 352.0452.

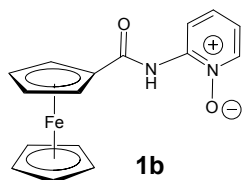

**1b:** M. P.  $164^\circ\text{C}$ - $167^\circ\text{C}$ . Yield (72%). Anal. Found: C, 59.81; H, 4.30; N, 8.78. Calcd for  $\text{C}_{16}\text{H}_{14}\text{FeN}_2\text{O}_2$ : C, 59.65; H, 4.38; N, 8.70.  $^1\text{H}$ NMR ( $\text{CDCl}_3$ ):  $\delta$  10.38 [1H, s, N-H],  $\delta$  8.49-8.46 [1H, d, Ph-H],  $\delta$  8.27-8.25 [1H, dd, Ph-H],  $\delta$  7.37-7.24 [1H, dd, Ph-H],  $\delta$  6.99-6.95 [1H, d, Ph-H],  $\delta$  4.89 [2H, Cp of Fc],  $\delta$  4.49 [2H, Cp of Fc],  $\delta$  4.26 [5H, Cp of Fc].  $^{13}\text{C}\{^1\text{H}\}(\text{CDCl}_3)$ :  $\delta$  169.59 (C=O),  $\delta$  144.43-114.48 (PhC), 71.80-68.84 CpC. HRMS: Calc.  $m/z$  for  $\text{C}_{16}\text{H}_{14}\text{FeN}_2\text{NaO}_2 [\text{M}+\text{Na}]^+$  345.0295; Found: 345.0296.

## D. General procedures for the formation of Palladacycles:

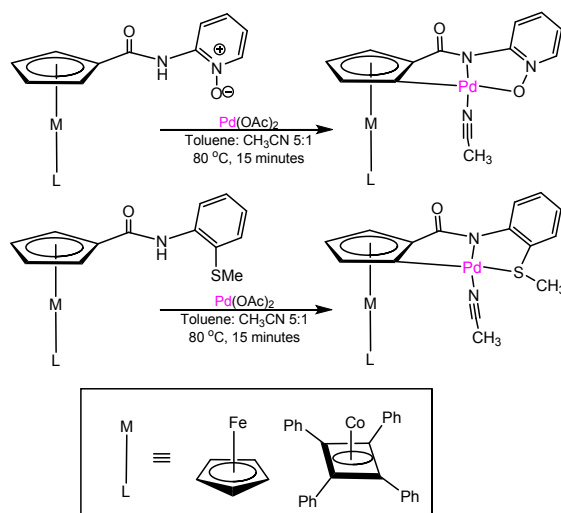

**Scheme S3:** Synthesis of palladacycles **2a**, **2b** and **5b**

Metal sandwich carboxamides were dissolved in toluene (1.5 mL) in a 5 mL reaction vial charged with a magnetic stir bar.  $\text{Pd}(\text{OAc})_2$  (1 equiv) was added to it and stirred at 80 °C for 5 to 10 minutes. A gradual colour change from deep red to dark brown was observed. The co solvent acetonitrile (0.3 mL) was added then and a colour change to deep red occurred instantly. The reaction was allowed to stir for further 10 minutes. The reaction mixture was cooled. It was directly put in the refrigerator resulting in the crystallization of the product.

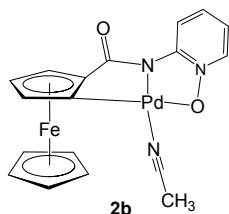

**2b:** Yield (80%). Anal. Found: C, 45.98; H, 3.41; N, 9.06. Calcd for  $\text{C}_{18}\text{H}_{15}\text{FeN}_3\text{O}_2\text{Pd}$ : C, 46.23; H, 3.23; N, 8.99.  $^1\text{H}$ NMR ( $\text{CDCl}_3$ ):  $\delta$  8.78-8.72 [1H, d, Ph-*H*],  $\delta$  7.93-7.90 [1H, d, Ph-*H*],  $\delta$  7.22-7.18 [1H, dd, Ph-*H*],  $\delta$  6.71-6.66 [1H, dd, Ph-*H*],  $\delta$  4.71-4.64 [1H, Cp of Fc],  $\delta$  4.43-4.30 [7H, Cp of Fc],  $\delta$  2.36 [3H, s,  $\text{CH}_3$  of acetonitrile].  $^{13}\text{C}\{^1\text{H}\}$ ( $\text{CDCl}_3$ ):  $\delta$  181.29 ( $\text{C}=\text{O}$ ),  $\delta$  152.91 (CN),  $\delta$  136.95-114.45 (PhC), 71.91-67.05 CpC, 3.51 [ $\text{CH}_3$  of AN]. HRMS: Calc.  $m/z$  for  $\text{C}_{17}\text{H}_{16}\text{FeNO}_3\text{Pd}$  [ $\text{M} (-\text{CH}_3\text{CN}) + \text{CH}_3\text{OH}$  (in  $\text{CH}_3\text{OH}$  solvent)] $^+$  443.9518; found: 443.9415.

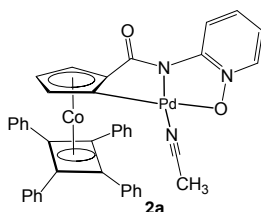

**2a:** Yield (92%). Anal. Found: C, 64.55; H, 3.93; N, 5.60. Calcd for  $C_{41}H_{30}CoPdN_3O_2$ : C, 64.62; H, 3.97; N, 5.51.  $^1H$ NMR ( $CDCl_3$ ):  $\delta$  8.33-8.30 [1H, d, Ph-*H*],  $\delta$  7.83-7.80 [1H, d, Ph-*H*],  $\delta$  7.64-7.62 [8H, m, Ph-*H*],  $\delta$  7.23-7.02 [13H, m, Ph-*H*],  $\delta$  6.60 [1H, m, Ph-*H*],  $\delta$  4.94-4.93 [1H, Cp*H*],  $\delta$  4.64 [1H, Cp*H*],  $\delta$  4.40-4.39 [1H, Cp*H*],  $\delta$  2.15 [3H, s,  $CH_3$  of acetonitrile].  $^{13}C\{^1H\}(CDCl_3)$ :  $\delta$  174.67 (C=O), 152.75 (CN), 137.88-114.13 (PhC), 98.58, 92.56, 85.97, 84.77, 83.04 (CpC), 75.59 (CbC), 3.51 ( $CH_3$  of acetonitrile). HRMS: Calc.  $m/z$  for  $C_{39}H_{28}N_2CoO_2Pd [M(-CH_3CN)+H]^+$  721.0526; found: 721.0541

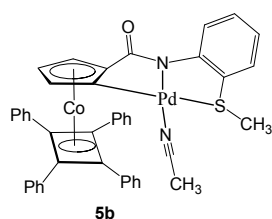

**5b:** Yield (81%)  $^1H$ NMR ( $CDCl_3$ ): Repeated attempts for obtaining  $^1H$  &  $^{13}C$  NMR was unsuccessful for **5b** due to decomposition of the palladacycle in various dry deuterated solvents. HRMS: Calc.  $m/z$  for  $C_{41}H_{30}CoNOSPd [M(-CH_3CN)+H]^+$  750.0502; found: 750.0496.

## E. Optimization of standard conditions for C-H borylation:

Table S1: Optimization of Base:

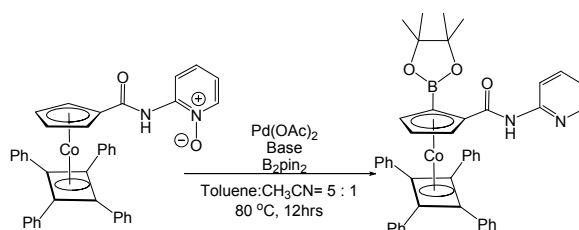

| Sr No | Base Used                       | Yield (%) |
|-------|---------------------------------|-----------|
| 1     | NaOAc                           | nil       |
| 2     | K <sub>2</sub> CO <sub>3</sub>  | nil       |
| 3     | Li <sub>2</sub> CO <sub>3</sub> | nil       |
| 4     | Na <sub>2</sub> CO <sub>3</sub> | nil       |
| 5     | NaHCO <sub>3</sub>              | nil       |
| 6     | Ag <sub>2</sub> CO <sub>3</sub> | 10        |
| 7     | Cs <sub>2</sub> CO <sub>3</sub> | nil       |
| 8     | AgOAc                           | 43        |
| 9     | -                               | 5         |



**Table S2: Optimization of Pd-catalyst loading:**

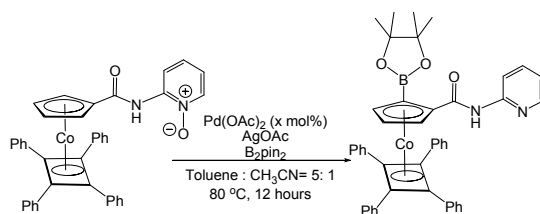

| Sr No | Catalyst loading (mol%) | Yield | TON  |
|-------|-------------------------|-------|------|
| 1     | 20                      | 43    | 2.15 |
| 2     | 15                      | 40    | 2.66 |
| 3     | 10                      | 37    | 3.7  |
| 4     | 5                       | 32    | 6.4  |
| 5     | 2                       | trace | -    |

**Table S3: Optimization of temperature & time:**

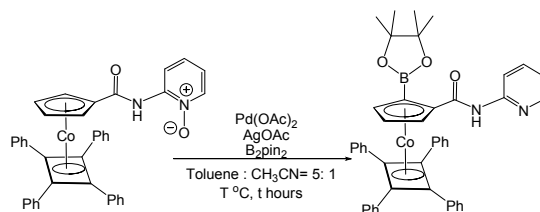

| Sr. No. | Temperature (°C) | Time (hours) | Yield (%) |
|---------|------------------|--------------|-----------|
| 1       | 100              | 12           | 18        |
| 2       | 80               | 12           | 43        |
| 3       | 80               | 24           | 40        |
| 4       | 70               | 12           | 35        |
| 5       | 70               | 24           | 33        |
| 5       | 60               | 12           | 8         |

**Table S4: Optimization of solvent & co-solvent:**

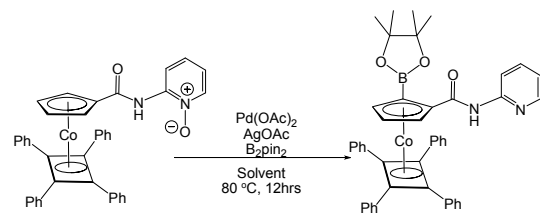

| Sr No | Solvent (1.5 mL) | Co-solvent (0.3 mL) | Yield (%) |
|-------|------------------|---------------------|-----------|
| 1     | DMF              | Nil                 | nil       |
| 2     | THF              | Nil                 | nil       |
| 3     | Xylene           | Nil                 | nil       |
| 4     | Xylene           | CH <sub>3</sub> CN  | <5        |
| 5     | DMSO             | Nil                 | nil       |
| 6     | tBuOH            | Nil                 | nil       |
| 7     | t-amyl alcohol   | Nil                 | nil       |
| 8     | DCE              | Nil                 | nil       |
| 9     | Toluene          | Nil                 | 10        |
| 10    | Toluene          | CH <sub>3</sub> CN  | 43        |

**Table S5: Borylating agent and its equivalents:**

| Sr. No. | Borylation reagent              | No. of equivalents | Yield (%) |
|---------|---------------------------------|--------------------|-----------|
| 1       | H-Bpin                          | 0.5                | nil       |
| 2       | H-Bpin                          | 1                  | nil       |
| 3       | H-Bpin                          | 2                  | nil       |
| 4       | B <sub>2</sub> pin <sub>2</sub> | 0.5                | 5         |
| 5       | B <sub>2</sub> pin <sub>2</sub> | 1                  | 20        |
| 6       | B <sub>2</sub> pin <sub>2</sub> | 2                  | 43        |
| 7       | B <sub>2</sub> pin <sub>2</sub> | 4                  | 41        |
| 8       | B <sub>2</sub> pin <sub>2</sub> | 8                  | 38        |
| 9       | B <sub>2</sub> pin <sub>2</sub> | 16                 | 40        |

### C-H silylation studies

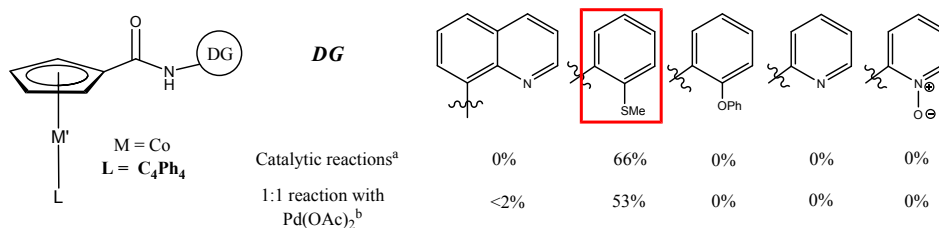

#### Screening of directing groups for C-H silylation

**Conditions:** a. Pd(OAc)<sub>2</sub> (20mol%), AgOAc (2equiv), Me<sub>3</sub>Si-SiMe<sub>3</sub> (2 equiv), in Toluene (1.5mL), acetonitrile (0.3 mL) as co-solvent. b. Pd(OAc)<sub>2</sub> (1 equiv), Me<sub>3</sub>Si-SiMe<sub>3</sub> (2 equiv), in Toluene (1.5mL), acetonitrile (0.3 mL) as co-solvent.

**Scheme S4:** Determination of suitable directing groups for C-H silylation.

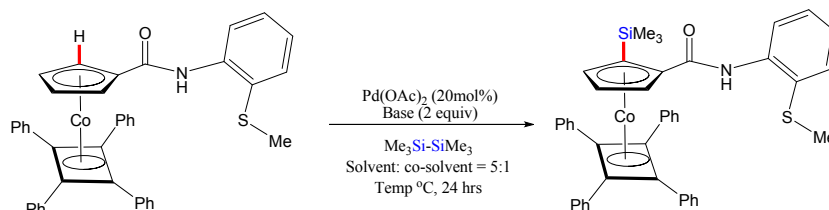

**Scheme S5:** C-H silylation reaction.

**Table S6: Optimization of the catalytic silylation reaction conditions:**

| Entry No  | Base                            | Solvent        | co-solvent              | Temp(°C)  | Yield <sup>a</sup> (%) |
|-----------|---------------------------------|----------------|-------------------------|-----------|------------------------|
| 1         | Li <sub>2</sub> CO <sub>3</sub> | Toluene        | -                       | 80        | nil                    |
| 2         | Na <sub>2</sub> CO <sub>3</sub> | Toluene        | -                       | 80        | nil                    |
| 3         | NaHCO <sub>3</sub>              | Toluene        | -                       | 80        | nil                    |
| 4         | Ag <sub>2</sub> CO <sub>3</sub> | Toluene        | -                       | 80        | nil                    |
| 5         | Cs <sub>2</sub> CO <sub>3</sub> | Toluene        | -                       | 80        | nil                    |
| 6         | NaOAc                           | Toluene        | -                       | 80        | nil                    |
| 7         | AgOAc                           | Toluene        | -                       | 80        | 16                     |
| 8         | AgOAc                           | 1,4 dioxane    | -                       | 80        | nil                    |
| 9         | AgOAc                           | tBuOH          | -                       | 80        | nil                    |
| 10        | AgOAc                           | DMF            | -                       | 80        | 5                      |
| 11        | AgOAc                           | DMSO           | -                       | 130       | nil                    |
| 12        | AgOAc                           | THF            | -                       | 67        | nil                    |
| 13        | AgOAc                           | Toluene        | CH <sub>3</sub> CN      | 100       | 35                     |
| <b>14</b> | <b>AgOAc</b>                    | <b>Toluene</b> | <b>CH<sub>3</sub>CN</b> | <b>80</b> | <b>66</b>              |
| 15        | -                               | Toluene        | CH <sub>3</sub> CN      | 80        | 18                     |
| 16        | AgOAc                           | Toluene        | CH <sub>3</sub> CN      | 80        | 51 <sup>b</sup>        |

<sup>a</sup>Isolated yields, <sup>b</sup>5mol% Pd(OAc)<sub>2</sub> was used.

## C-H selenation Studies

### Screening of the directing group

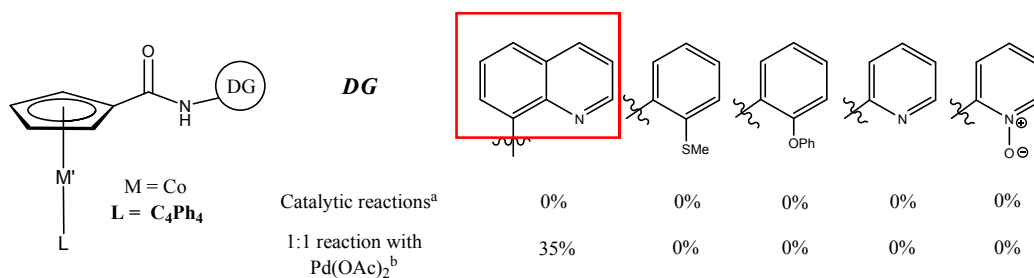

### Screening of directing groups for C-H selenation

**Conditions:** a. Pd(OAc)<sub>2</sub> (20mol%), AgOAc (2equiv), PhSe-SePh (2 equiv), in Toluene (1.5mL), acetonitrile (0.3 mL) as co-solvent. b. Pd(OAc)<sub>2</sub> (1 equiv), PhSe-SePh (2 equiv), in DCE (2mL).

**Scheme S6:** Determination of suitable directing groups for C-H selenation.

## F. Synthesis of the alpha mono C-H Selenated cobalt sandwich compound (9):

A 5 mL catalytic vial was charged with a magnetic stir bar. Palladacycle of 8-aminoquinoline based cobalt sandwich carboxamide **8** was treated with diphenyldiselenide at 80 °C in

dichloroethane. The reaction mixture was allowed to stir for 24 hrs. Then it was cooled to room temperature and was purified by column chromatography using silica gel using hexane: ethylacetate (9: 1) as eluent.

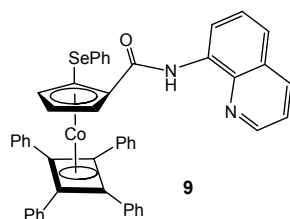

**9:** Yellow solid. MP: decomp. above 155°-157°C. Yield (35%). Anal. Found: C, 73.21; H, 4.44; N, 3.29. Calcd for  $C_{49}H_{35}N_2OCoSe$ : C, 73.04; H, 4.38; N, 3.48.  $^1H$ NMR ( $CDCl_3$ ):  $\delta$  10.72 [1H, s, N-H],  $\delta$  8.65 [1H, d, Ph-H],  $\delta$  8.42 [1H, d, Ph-H],  $\delta$  8.11-8.09 [1H, d, Ph-H],  $\delta$  7.60-7.44 [12H, m, Ph-H],  $\delta$  7.19-7.07 [15H, m, Ph-H],  $\delta$  5.57 [1H, CpH],  $\delta$  4.92-4.90 [2H, s, CpH].  $^{13}C\{^1H\}(CDCl_3)$ :  $\delta$  163.51 (C=O),  $\delta$  147.95-117.86 (PhC), 90.86-85.24 (CpC), 77.83 (CbC). HRMS: Calc. m/z for  $C_{49}H_{35}N_2OCoSeNa$  [M+Na] $^+$  829.1144; found: 829.1113

### G. Synthesis of the alpha, alpha bis C-H selenated ferrocene derivative (12):

A 5 mL reaction vial was charged with a magnetic stir bar. Palladacycle of 8-aminoquinoline based ferrocene carboxamide **11** (50 mg, 0.099 mmol) was treated with diphenyldiselenide (30.9 mg, 0.099 mmol) at 80 °C in dichloroethane (2 mL). The reaction mixture was allowed to stir for 24 hrs. Then it was cooled to room temperature and was purified by column chromatography using silica gel using hexane: ethylacetate (9: 1) as eluent.

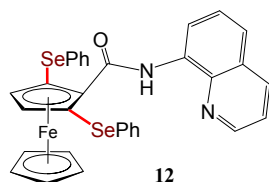

**12:** Yellow solid. MP: decomp. above 133°C. Yield (60%). Anal. Found: C, 58.06; H, 3.43; N, 4.11. Calcd for  $C_{32}H_{24}FeN_2OSe_2$ : C, 57.68; H, 3.63; N, 4.20.  $^1H$ NMR ( $CDCl_3$ ):  $\delta$  11.57 [1H, s, N-H],  $\delta$  8.95-8.93 [1H, Ph-H],  $\delta$  8.73 [1H, Ph-H],  $\delta$  8.16-8.14 [1H, Ph-H],  $\delta$  7.59-7.51 [6H, m, Ph-H],  $\delta$  7.44-7.19 [7H, m, Ph-H],  $\delta$  4.41-4.36 [2H, CpH],  $\delta$  4.36-4.30 [5H, s, CpH].  $^{13}C\{^1H\}(CDCl_3)$ :  $\delta$  168.78 (C=O),  $\delta$  148.04-117.61 (PhC), 76.58, 76.17, 73.18 (CpC).

### Catalytic activity of palladacycles:

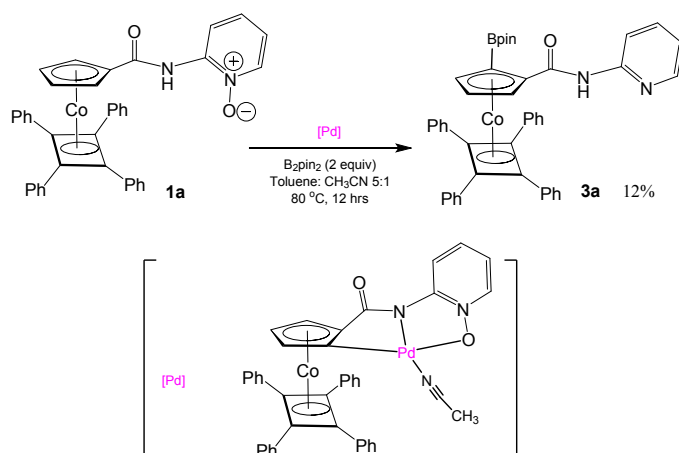

A catalytic reaction vial was charged with a magnetic stir bar. Ligand **1a** (50 mg, 0.08mmol), palladacycle **2a** (6.1 mg, 0.008 mmol), AgOAc (26.7 mg, 0.16 mmol) and  $B_2pin_2$  (40.6 mg, 0.016 mmol) were added to it. The mixture was dissolved in 5:1 mixture of toluene and acetonitrile. The reaction mixture was stirred for 12 hours at 80 °C. The progress of the reaction was checked using TLC. The reaction mixture was cooled to room temperature. It was purified by column chromatography using silica gel 60-120 mesh using hexane : ethyl acetate (13 : 7) as eluent. Yield of **3a** 12%.

**H. Table-S7: X-ray crystallographic data for compounds 1a, 1b, 2a:<sup>5</sup>**

| Identification code               | <b>1a</b>                                                                                   | <b>1b</b>                                                                              | <b>2a</b>                                                                                        |
|-----------------------------------|---------------------------------------------------------------------------------------------|----------------------------------------------------------------------------------------|--------------------------------------------------------------------------------------------------|
| Empirical formula                 | C <sub>39</sub> H <sub>29</sub> Co N <sub>2</sub> O <sub>2</sub>                            | C <sub>16</sub> H <sub>14</sub> Fe N <sub>2</sub> O <sub>2</sub>                       | C <sub>41</sub> H <sub>30</sub> Co N <sub>3</sub> O <sub>2</sub> Pd                              |
| Formula weight                    | 616.57                                                                                      | 322.14                                                                                 | 762.01                                                                                           |
| Temperature                       | 273(2) K                                                                                    | 273(2) K                                                                               | 273(2) K                                                                                         |
| Wavelength                        | 0.71073 Å                                                                                   | 0.71073 Å                                                                              | 0.71073 Å                                                                                        |
| Crystal system                    | Monoclinic                                                                                  | Orthorhombic                                                                           | Monoclinic                                                                                       |
| Space group                       | P 2 <sub>1</sub> /c                                                                         | P n a 2 <sub>1</sub>                                                                   | P 2 <sub>1</sub> /n                                                                              |
| Unit cell dimensions              | a = 12.92(4) Å<br>b = 14.34(4) Å<br>c = 17.16(6) Å<br>α = 90°.<br>β = 93.61(3)°<br>γ = 90°. | a = 13.66(3) Å<br>b = 19.02(4) Å<br>c = 10.88(2) Å<br>α = 90°.<br>β = 90°.<br>γ = 90°. | a = 11.024(11) Å<br>b = 20.65(2) Å<br>c = 14.762(11) Å<br>α = 90°.<br>β = 97.10(3)°.<br>γ = 90°. |
| Volume                            | 3173(17) Å <sup>3</sup>                                                                     | 2825(9) Å <sup>3</sup>                                                                 | 3334(6) Å <sup>3</sup>                                                                           |
| Z                                 | 4                                                                                           | 8                                                                                      | 4                                                                                                |
| Density (calculated)              | 1.291 Mg/m <sup>3</sup>                                                                     | 1.515 Mg/m <sup>3</sup>                                                                | 1.518 Mg/m <sup>3</sup>                                                                          |
| Absorption coefficient            | 0.577 mm <sup>-1</sup>                                                                      | 1.072 mm <sup>-1</sup>                                                                 | 1.078 mm <sup>-1</sup>                                                                           |
| F(000)                            | 1280                                                                                        | 1328                                                                                   | 1544                                                                                             |
| Crystal size                      | 0.324 x 0.251 x 0.146 mm <sup>3</sup>                                                       | 0.354 x 0.251 x 0.164 mm <sup>3</sup>                                                  | 0.345 x 0.255 x 0.165 mm <sup>3</sup>                                                            |
| Theta range for data collection   | 1.579 to 28.316°.                                                                           | 1.836 to 28.298°.                                                                      | 2.107 to 28.283°.                                                                                |
| Index ranges                      | -12 ≤ h ≤ 12, -19 ≤ k ≤ 18, -<br>22 ≤ l ≤ 18                                                | -12 ≤ h ≤ 18, -25 ≤ k ≤ 24, -<br>13 ≤ l ≤ 14                                           | -13 ≤ h ≤ 14, -8 ≤ k ≤ 27, -<br>19 ≤ l ≤ 19                                                      |
| Reflections collected             | 17820                                                                                       | 17776                                                                                  | 16351                                                                                            |
| Independent reflections           | 6419 [R(int) = 0.0701]                                                                      | 6214 [R(int) = 0.0659]                                                                 | 7700 [R(int) = 0.0939]                                                                           |
| Completeness to theta             | 98.0 % (theta max=28.316°)                                                                  | 100.0 % (theta max=28.298°)                                                            | 99.8 % (theta max=28.283°)                                                                       |
| Max. and min. transmission        | 0.945 and 0.816                                                                             | 0.853 and 0.713                                                                        | 0.849 and 0.711                                                                                  |
| Data / restraints / parameters    | 6419 / 0 / 401                                                                              | 6214 / 1 / 387                                                                         | 7700 / 0 / 434                                                                                   |
| Goodness-of-fit on F <sup>2</sup> | 0.882                                                                                       | 0.921                                                                                  | 0.724                                                                                            |
| Final R indices [I > 2σ(I)]       | R1 = 0.0438, wR2 = 0.0849                                                                   | R1 = 0.0445, wR2 = 0.0822                                                              | R1 = 0.0498, wR2 = 0.0634                                                                        |
| R indices (all data)              | R1 = 0.0754, wR2 = 0.0924                                                                   | R1 = 0.0653, wR2 = 0.0898                                                              | R1 = 0.1168, wR2 = 0.0749                                                                        |
| Largest diff. peak and hole       | 0.310 and -0.472 e.Å <sup>-3</sup>                                                          | 0.382 and -0.295 e.Å <sup>-3</sup>                                                     | 0.577 and -0.704 e.Å <sup>-3</sup>                                                               |

$$R_1 = \frac{\sum |F_o| - |F_c|}{\sum |F_o|}; \quad wR_2 = \frac{\sum (|F_o|^2 - |F_c|^2)^2}{\sum |F_o|^4}^{1/2}$$

**H. Table-S8: X-ray crystallographic data for compounds 2b, 3a, 4a:<sup>5</sup>**

| Identification code               | <b>2b</b>                                                                                               | <b>3a</b>                                                                                              | <b>4a</b>                                                                          |
|-----------------------------------|---------------------------------------------------------------------------------------------------------|--------------------------------------------------------------------------------------------------------|------------------------------------------------------------------------------------|
| Empirical formula                 | C <sub>36</sub> H <sub>32</sub> Fe <sub>2</sub> N <sub>6</sub> O <sub>5</sub> Pd <sub>2</sub>           | C <sub>45</sub> H <sub>40</sub> B Co N <sub>2</sub> O <sub>3</sub>                                     | C <sub>18</sub> H <sub>17</sub> Fe N O S                                           |
| Formula weight                    | 953.18                                                                                                  | 726.53                                                                                                 | 351.23                                                                             |
| Temperature                       | 293(2) K                                                                                                | 273(2) K                                                                                               | 273(2) K                                                                           |
| Wavelength                        | 0.71073 Å                                                                                               | 0.71073 Å                                                                                              | 0.71073 Å                                                                          |
| Crystal system                    | Triclinic                                                                                               | Triclinic                                                                                              | Orthorhombic                                                                       |
| Space group                       | P -1                                                                                                    | P -1                                                                                                   | P 21 21 21                                                                         |
| Unit cell dimensions              | a = 10.80(3) Å<br>b = 11.71(3) Å<br>c = 15.37(4) Å<br>α = 95.62(4)°<br>β = 101.53(4)°<br>γ = 103.73(4)° | a = 11.64(5) Å<br>b = 13.37(5) Å<br>c = 13.68(6) Å<br>α = 65.93(10)°<br>β = 78.53(7)°<br>γ = 77.94(7)° | a = 9.91(3) Å<br>b = 12.38(3) Å<br>c = 14.01(4) Å<br>α = 90°<br>β = 90°<br>γ = 90° |
| Volume                            | 1828(9) Å <sup>3</sup>                                                                                  | 1886(14) Å <sup>3</sup>                                                                                | 1719(8) Å <sup>3</sup>                                                             |
| Z                                 | 2                                                                                                       | 2                                                                                                      | 4                                                                                  |
| Density (calculated)              | 1.731 Mg/m <sup>3</sup>                                                                                 | 1.279 Mg/m <sup>3</sup>                                                                                | 1.357 Mg/m <sup>3</sup>                                                            |
| Absorption coefficient            | 1.795 mm <sup>-1</sup>                                                                                  | 0.498 mm <sup>-1</sup>                                                                                 | 0.999 mm <sup>-1</sup>                                                             |
| F(000)                            | 948                                                                                                     | 760                                                                                                    | 728                                                                                |
| Crystal size                      | 0.365 x 0.245 x 0.115 mm <sup>3</sup>                                                                   | 0.364 x 0.286 x 0.199 mm <sup>3</sup>                                                                  | 0.398 x 0.287 x 0.176 mm <sup>3</sup>                                              |
| Theta range for data collection   | 1.368 to 28.303°                                                                                        | 1.851 to 28.231°                                                                                       | 2.195 to 28.121°                                                                   |
| Index ranges                      | -14 ≤ h ≤ 14, -15 ≤ k ≤ 12, -19 ≤ l ≤ 16                                                                | -12 ≤ h ≤ 15, -17 ≤ k ≤ 17, -18 ≤ l ≤ 14                                                               | -9 ≤ h ≤ 11, -3 ≤ k ≤ 16, -10 ≤ l ≤ 18                                             |
| Reflections collected             | 11198                                                                                                   | 11692                                                                                                  | 3606                                                                               |
| Independent reflections           | 8081 [R(int) = 0.1188]                                                                                  | 8470 [R(int) = 0.0585]                                                                                 | 2951 [R(int) = 0.0390]                                                             |
| Completeness to theta             | 98.6 % (theta_max = 28.303°)                                                                            | 98.2 % (theta_max = 28.231°)                                                                           | 98.0 % (theta_max = 28.121°)                                                       |
| Max. and min. transmission        | 0.831 and 0.569                                                                                         | 0.921 and 0.823                                                                                        | 0.858 and 0.699                                                                    |
| Data / restraints / parameters    | 8081 / 0 / 465                                                                                          | 8470 / 0 / 477                                                                                         | 2951 / 1 / 205                                                                     |
| Goodness-of-fit on F <sup>2</sup> | 0.931                                                                                                   | 0.832                                                                                                  | 0.864                                                                              |
| Final R indices [I > 2σ(I)]       | R1 = 0.0500, wR2 = 0.1147                                                                               | R1 = 0.0529, wR2 = 0.0901                                                                              | R1 = 0.0377, wR2 = 0.0643                                                          |
| R indices (all data)              | R1 = 0.0816, wR2 = 0.1340                                                                               | R1 = 0.0960, wR2 = 0.1025                                                                              | R1 = 0.0533, wR2 = 0.0687                                                          |
| Largest diff. peak and hole       | 1.113 and -1.391 e.Å <sup>-3</sup>                                                                      | 0.384 and -0.398 e.Å <sup>-3</sup>                                                                     | 0.372 and -0.274 e.Å <sup>-3</sup>                                                 |

$$R_1 = \frac{\sum |F_o| - |F_c|}{\sum |F_o|}; \quad wR_2 = \frac{\sum (|F_o|^2 - |F_c|^2)^2}{\sum |F_o|^2}^{\frac{1}{2}}$$

**H. Table-S9: X-ray crystallographic data for compounds 4b, 5b, 6b:<sup>5</sup>**

| Identification code               | 4b                                                                                                                                       | 5b                                                                                                                                                | 6b                                                                                                                                                |
|-----------------------------------|------------------------------------------------------------------------------------------------------------------------------------------|---------------------------------------------------------------------------------------------------------------------------------------------------|---------------------------------------------------------------------------------------------------------------------------------------------------|
| Empirical formula                 | C41 H32 Co N O S                                                                                                                         | C46 H39 Cl2 Co N2 O3 Pd S                                                                                                                         | C48 H44 B Cl3 Co N O3 S                                                                                                                           |
| Formula weight                    | 645.66                                                                                                                                   | 936.08                                                                                                                                            | 890.99                                                                                                                                            |
| Temperature                       | 304(2) K                                                                                                                                 | 273(2) K                                                                                                                                          | 273(2) K                                                                                                                                          |
| Wavelength                        | 0.71073 Å                                                                                                                                | 0.71073 Å                                                                                                                                         | 0.71073 Å                                                                                                                                         |
| Crystal system                    | Monoclinic                                                                                                                               | Triclinic                                                                                                                                         | Triclinic                                                                                                                                         |
| Space group                       | P 21/c                                                                                                                                   | P -1                                                                                                                                              | P -1                                                                                                                                              |
| Unit cell dimensions              | a = 11.255(6) Å<br>b = 22.409(10) Å<br>c = 12.599(6) Å<br>$\alpha = 90^\circ$ .<br>$\beta = 90.186(16)^\circ$ .<br>$\gamma = 90^\circ$ . | a = 11.285(19) Å<br>b = 13.21(2) Å<br>c = 15.82(3) Å<br>$\alpha = 98.50(2)^\circ$ .<br>$\beta = 97.19(4)^\circ$ .<br>$\gamma = 107.13(3)^\circ$ . | a = 10.257(2) Å<br>b = 11.746(2) Å<br>c = 18.873(4) Å<br>$\alpha = 96.25(3)^\circ$ .<br>$\beta = 92.91(3)^\circ$ .<br>$\gamma = 94.13(3)^\circ$ . |
| Volume                            | 3178(3) Å <sup>3</sup>                                                                                                                   | 2192(6) Å <sup>3</sup>                                                                                                                            | 2250.4(8) Å <sup>3</sup>                                                                                                                          |
| Z                                 | 4                                                                                                                                        | 2                                                                                                                                                 | 2                                                                                                                                                 |
| Density (calculated)              | 1.350 Mg/m <sup>3</sup>                                                                                                                  | 1.418 Mg/m <sup>3</sup>                                                                                                                           | 1.315 Mg/m <sup>3</sup>                                                                                                                           |
| Absorption coefficient            | 0.640 mm <sup>-1</sup>                                                                                                                   | 0.999 mm <sup>-1</sup>                                                                                                                            | 0.647 mm <sup>-1</sup>                                                                                                                            |
| F(000)                            | 1344                                                                                                                                     | 952                                                                                                                                               | 924                                                                                                                                               |
| Crystal size                      | 0.388 x 0.298 x 0.211 mm <sup>3</sup>                                                                                                    | 0.351 x 0.268 x 0.148 mm <sup>3</sup>                                                                                                             | 0.355 x 0.275 x 0.195 mm <sup>3</sup>                                                                                                             |
| Theta range for data collection   | 2.565 to 26.433°.                                                                                                                        | 1.645 to 24.534°.                                                                                                                                 | 2.162 to 28.466°.                                                                                                                                 |
| Index ranges                      | -14<= <i>h</i> <=11, -28<= <i>k</i> <=28, -11<= <i>l</i> <=15                                                                            | -12<= <i>h</i> <=12, -10<= <i>k</i> <=15, -17<= <i>l</i> <=18                                                                                     | -10<= <i>h</i> <=13, -15<= <i>k</i> <=15, -25<= <i>l</i> <=21                                                                                     |
| Reflections collected             | 13462                                                                                                                                    | 8928                                                                                                                                              | 14974                                                                                                                                             |
| Independent reflections           | 6363 [R(int) = 0.0338]                                                                                                                   | 6500 [R(int) = 0.0241]                                                                                                                            | 10383 [R(int) = 0.1101]                                                                                                                           |
| Completeness to theta             | 98.9 % (theta_max=26.433°)                                                                                                               | 98.9 % (theta_max=24.534°)                                                                                                                        | 98.7 % (theta_max=28.466°)                                                                                                                        |
| Max. and min. transmission        | 0.889 and 0.777                                                                                                                          | 0.887 and 0.711                                                                                                                                   | 0.908 and 0.781                                                                                                                                   |
| Data / restraints / parameters    | 6363 / 0 / 412                                                                                                                           | 6500 / 0 / 509                                                                                                                                    | 10383 / 0 / 532                                                                                                                                   |
| Goodness-of-fit on F <sup>2</sup> | 1.025                                                                                                                                    | 1.005                                                                                                                                             | 0.776                                                                                                                                             |
| Final R indices [I>2sigma(I)]     | R1 = 0.0467, wR2 = 0.1073                                                                                                                | R1 = 0.0426, wR2 = 0.1035                                                                                                                         | R1 = 0.0626, wR2 = 0.1201                                                                                                                         |
| R indices (all data)              | R1 = 0.0869, wR2 = 0.1237                                                                                                                | R1 = 0.0566, wR2 = 0.1112                                                                                                                         | R1 = 0.1639, wR2 = 0.1506                                                                                                                         |
| Largest diff. peak and hole       | 0.224 and -0.388 e.Å <sup>-3</sup>                                                                                                       | 0.595 and -0.439 e.Å <sup>-3</sup>                                                                                                                | 0.420 and -0.422 e.Å <sup>-3</sup>                                                                                                                |

$$R_1 = \frac{\sum |F_o| - |F_c|}{\sum |F_o|}; \quad wR_2 = \frac{\sum (|F_o|^2 - |F_c|^2)^2}{\sum |F_o|^4}^{1/2}$$



**H. Table-S10: X-ray crystallographic data for compounds 7, 9:<sup>5</sup>**

| Identification code               | 7                                                                                                                         | 9                                                                                                       |
|-----------------------------------|---------------------------------------------------------------------------------------------------------------------------|---------------------------------------------------------------------------------------------------------|
| Empirical formula                 | C44 H40 Co N O S Si                                                                                                       | C49 H35 Co N2 O Se                                                                                      |
| Formula weight                    | 717.85                                                                                                                    | 805.68                                                                                                  |
| Temperature                       | 273(2) K                                                                                                                  | 273(2) K                                                                                                |
| Wavelength                        | 0.71073 Å                                                                                                                 | 0.71073 Å                                                                                               |
| Crystal system                    | Triclinic                                                                                                                 | Orthorhombic                                                                                            |
| Space group                       | P -1                                                                                                                      | P 21 21 21                                                                                              |
| Unit cell dimensions              | a = 13.00(3) Å<br>b = 13.25(3) Å<br>c = 23.77(5) Å<br>$\alpha$ = 84.63(2)°<br>$\beta$ = 86.64(2)°<br>$\gamma$ = 72.88(3)° | a = 10.27(2) Å<br>b = 16.50(3) Å<br>c = 23.24(5) Å<br>$\alpha$ = 90°<br>$\beta$ = 90°<br>$\gamma$ = 90° |
| Volume                            | 3895(13) Å <sup>3</sup>                                                                                                   | 3936(14) Å <sup>3</sup>                                                                                 |
| Z                                 | 4                                                                                                                         | 4                                                                                                       |
| Density (calculated)              | 1.224 Mg/m <sup>3</sup>                                                                                                   | 1.360 Mg/m <sup>3</sup>                                                                                 |
| Absorption coefficient            | 0.558 mm <sup>-1</sup>                                                                                                    | 1.400 mm <sup>-1</sup>                                                                                  |
| F(000)                            | 1504                                                                                                                      | 1648                                                                                                    |
| Crystal size                      | 0.368 x 0.246 x 0.152 mm <sup>3</sup>                                                                                     | 0.388 x 0.278 x 0.196 mm <sup>3</sup>                                                                   |
| Theta range for data collection   | 1.767 to 24.999°                                                                                                          | 1.514 to 27.910°                                                                                        |
| Index ranges                      | -15 ≤ h ≤ 15, -7 ≤ k ≤ 15, -<br>28 ≤ l ≤ 28                                                                               | -12 ≤ h ≤ 12, -21 ≤ k ≤ 10, -<br>30 ≤ l ≤ 30                                                            |
| Reflections collected             | 20295                                                                                                                     | 20113                                                                                                   |
| Independent reflections           | 13544 [R(int) = 0.0566]                                                                                                   | 8682 [R(int) = 0.1003]                                                                                  |
| Completeness to theta             | 98.6 % (theta_max = 24.999°)                                                                                              | 98.6 % (theta_max = 27.910°)                                                                            |
| Max. and min. transmission        | 0.934 and 0.832                                                                                                           | 0.779 and 0.615                                                                                         |
| Data / restraints / parameters    | 13544 / 0 / 899                                                                                                           | 8682 / 0 / 488                                                                                          |
| Goodness-of-fit on F <sup>2</sup> | 0.916                                                                                                                     | 1.064                                                                                                   |
| Final R indices [I > 2σ(I)]       | R1 = 0.0559, wR2 = 0.1212                                                                                                 | R1 = 0.0940, wR2 = 0.1256                                                                               |
| R indices (all data)              | R1 = 0.0966, wR2 = 0.1339                                                                                                 | R1 = 0.1529, wR2 = 0.1426                                                                               |
| Largest diff. peak and hole       | 0.802 and -0.347 e.Å <sup>-3</sup>                                                                                        | 1.047 and -0.459 e.Å <sup>-3</sup>                                                                      |

$$R_1 = \frac{\sum |F_o| - |F_c|}{\sum |F_o|}; \quad wR_2 = \frac{\sum (|F_o|^2 - |F_c|^2)^2}{\sum |F_o|^2} \}^{1/2}$$

## I. Selected Bond-lengths and bond-angles:<sup>5</sup>

1a

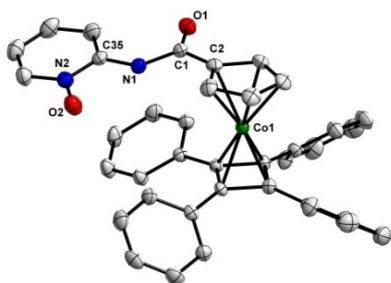

**Table-S11 (1a)**

Bond lengths (Å)

|            |          |
|------------|----------|
| O(1)-C(1)  | 1.243(4) |
| O(2)-N(2)  | 1.345(4) |
| N(1)-C(35) | 1.397(4) |
| N(1)-C(1)  | 1.401(4) |
| C(1)-C(2)  | 1.499(4) |

Bond Angles (deg)

|                 |          |
|-----------------|----------|
| O(1)-C(1)-N(1)  | 122.9(2) |
| O(1)-C(1)-C(2)  | 123.6(3) |
| N(1)-C(1)-C(2)  | 113.5(3) |
| O(2)-N(2)-C(35) | 118.9(2) |
| C(35)-N(1)-C(1) | 128.5(3) |

1b

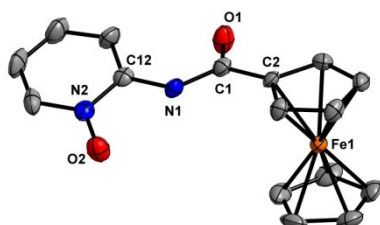

**Table-S12 (1b)**

Bond lengths (Å)

|            |          |
|------------|----------|
| O(1)-C(1)  | 1.213(6) |
| O(2)-N(2)  | 1.329(5) |
| N(1)-C(12) | 1.380(6) |
| N(1)-C(1)  | 1.390(7) |
| C(1)-C(2)  | 1.491(7) |

Bond Angles (deg)

|                  |          |
|------------------|----------|
| O(1)-C(1)-N(1)   | 123.6(5) |
| O(1)-C(1)-C(2)   | 123.5(5) |
| N(1)-C(1)-C(2)   | 112.9(4) |
| O(2)-N(2)-C(12)  | 118.2(4) |
| C(16)-N(2)-C(12) | 120.1(4) |

2a

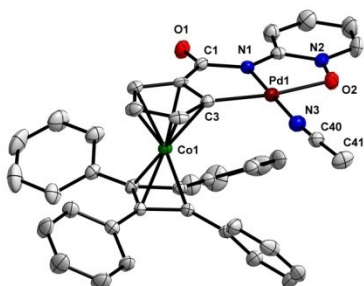

**Table-S13 (2a)**

Bond lengths (Å)

|            |          |
|------------|----------|
| Pd(1)-C(3) | 1.960(4) |
| Pd(1)-N(1) | 1.972(3) |
| Pd(1)-N(3) | 2.005(4) |
| Pd(1)-O(2) | 2.090(3) |
| O(2)-N(2)  | 1.357(4) |

Bond Angles (deg)

|                 |            |
|-----------------|------------|
| C(3)-Pd(1)-N(1) | 83.06(16)  |
| C(3)-Pd(1)-N(3) | 97.94(16)  |
| N(1)-Pd(1)-N(3) | 178.75(15) |
| C(3)-Pd(1)-O(2) | 163.58(14) |
| N(1)-Pd(1)-O(2) | 80.55(13)  |

2b

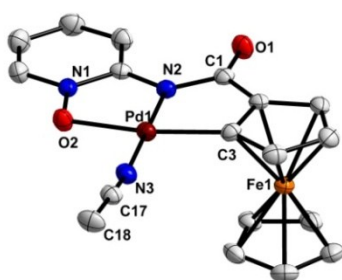

**Table-S14 (2b)**

Bond lengths (Å)

|            |          |
|------------|----------|
| Pd(1)-C(3) | 2.006(6) |
| Pd(1)-N(1) | 2.024(5) |
| Pd(1)-N(3) | 2.055(6) |
| Pd(1)-O(2) | 2.149(5) |
| O(2)-N(1)  | 1.373(6) |

Bond Angles (deg)

|                 |            |
|-----------------|------------|
| C(3)-Pd(1)-N(3) | 96.7(3)    |
| N(1)-Pd(1)-N(3) | 179.46(16) |
| C(3)-Pd(1)-O(2) | 162.99(17) |
| N(1)-Pd(1)-O(2) | 79.9(3)    |
| N(3)-Pd(1)-O(2) | 100.3(3)   |

**3a**

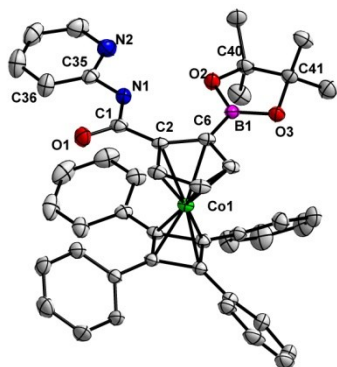

**Table-S15 (3a)**

Bond lengths (Å)

|           |          |
|-----------|----------|
| O(2)-B(1) | 1.394(5) |
| O(3)-B(1) | 1.374(7) |
| C(6)-B(1) | 1.562(6) |
| N(1)-C(1) | 1.377(5) |
| O(1)-C(1) | 1.243(5) |

Bond Angles (deg)

|                 |          |
|-----------------|----------|
| B(1)-O(2)-C(40) | 106.9(3) |
| B(1)-O(3)-C(41) | 106.8(2) |
| O(3)-B(1)-O(2)  | 113.6(3) |
| O(3)-B(1)-C(6)  | 123.3(3) |
| O(2)-B(1)-C(6)  | 123.0(4) |

**4a**

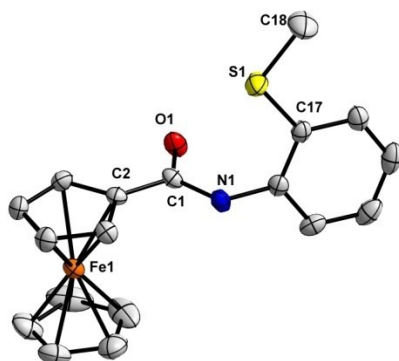

**Table-S16 (4a)**

Bond lengths (Å)

|            |          |
|------------|----------|
| O(1)-C(1)  | 1.238(6) |
| N(1)-C(1)  | 1.391(7) |
| S(1)-C(17) | 1.801(6) |
| S(1)-C(18) | 1.808(7) |
| N(1)-C(12) | 1.464(6) |

Bond Angles (deg)

|                  |          |
|------------------|----------|
| O(1)-C(1)-N(1)   | 122.5(5) |
| O(1)-C(1)-C(2)   | 122.6(5) |
| N(1)-C(1)-C(2)   | 114.9(5) |
| C(16)-C(17)-S(1) | 123.7(4) |
| C(12)-C(17)-S(1) | 117.2(3) |

**4b**

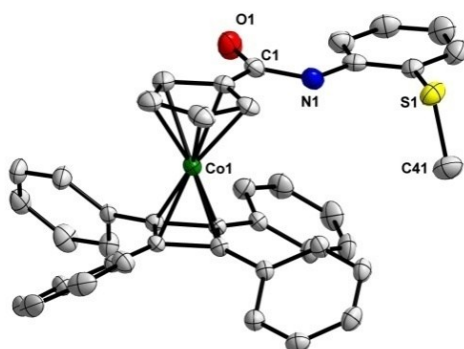

**Table-S17 (4b)**

Bond lengths (Å)

|            |          |
|------------|----------|
| O(1)-C(1)  | 1.212(4) |
| N(1)-C(1)  | 1.367(4) |
| N(1)-C(35) | 1.395(4) |
| S(1)-C(40) | 1.767(4) |
| S(1)-C(41) | 1.779(4) |

Bond Angles (deg)

|                  |          |
|------------------|----------|
| O(1)-C(1)-N(1)   | 123.4(3) |
| O(1)-C(1)-C(2)   | 121.6(3) |
| N(1)-C(1)-C(2)   | 115.0(3) |
| C(39)-C(40)-S(1) | 118.7(3) |
| C(35)-C(40)-S(1) | 120.8(2) |

5b

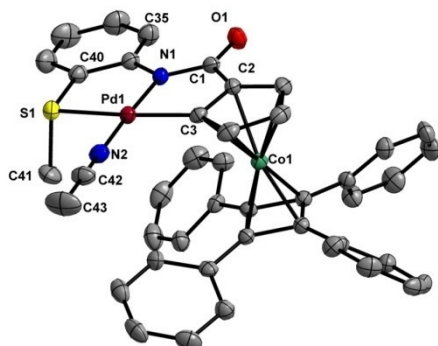**Table-S18 (5b)**

Bond lengths (Å)

|            |          |
|------------|----------|
| Pd(1)-C(3) | 2.006(5) |
| Pd(1)-N(2) | 2.040(5) |
| Pd(1)-N(1) | 2.050(5) |
| Pd(1)-S(1) | 2.410(4) |
| S(1)-C(41) | 1.847(5) |

Bond Angles (deg)

|                 |            |
|-----------------|------------|
| C(3)-Pd(1)-N(1) | 83.29(16)  |
| N(2)-Pd(1)-N(1) | 176.69(15) |
| C(3)-Pd(1)-S(1) | 168.09(11) |
| N(2)-Pd(1)-S(1) | 98.03(14)  |
| N(1)-Pd(1)-S(1) | 85.26(13)  |

6b

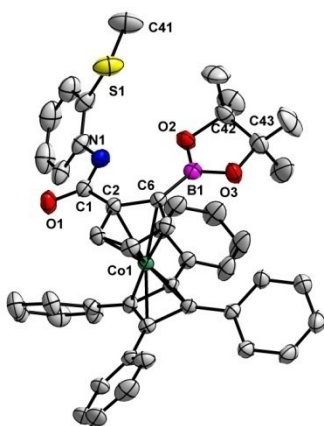**Table-S19 (6b)**

Bond lengths (Å)

|            |          |
|------------|----------|
| O(2)-B(1)  | 1.381(6) |
| O(3)-B(1)  | 1.367(5) |
| N(1)-C(1)  | 1.357(5) |
| C(6)-B(1)  | 1.552(6) |
| S(1)-C(41) | 1.814(5) |

Bond Angles (deg)

|                |          |
|----------------|----------|
| O(3)-B(1)-O(2) | 112.9(4) |
| O(3)-B(1)-C(6) | 122.1(4) |
| O(2)-B(1)-C(6) | 125.0(4) |
| O(1)-C(1)-N(1) | 124.2(4) |
| O(1)-C(1)-C(2) | 118.5(4) |

7

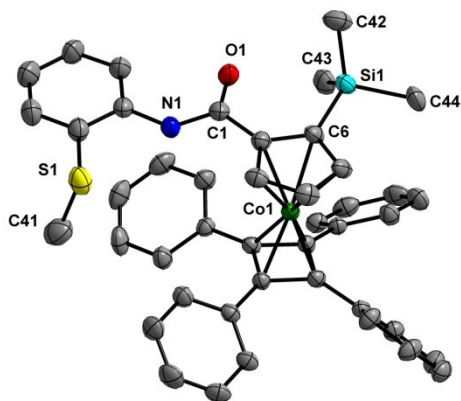**Table-S20 (7)**

Bond lengths (Å)

|             |          |
|-------------|----------|
| S(1)-C(40)  | 1.803(5) |
| S(1)-C(41)  | 1.805(6) |
| Si(1)-C(43) | 1.876(5) |
| Si(1)-C(6)  | 1.919(5) |
| O(1)-C(1)   | 1.231(4) |

Bond Angles (deg)

|                   |            |
|-------------------|------------|
| C(43)-Si(1)-C(44) | 110.6(2)   |
| C(43)-Si(1)-C(42) | 108.7(2)   |
| C(44)-Si(1)-C(42) | 106.8(2)   |
| C(43)-Si(1)-C(6)  | 115.86(16) |
| C(44)-Si(1)-C(6)  | 108.37(18) |

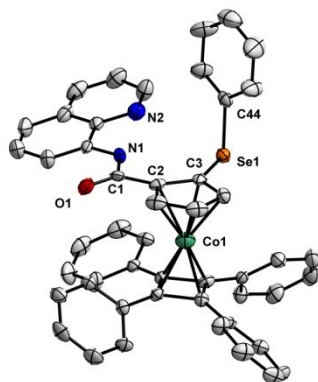**Table-S21 (9)**

Bond lengths (Å)

Se(1)-C(3) 1.934(10)

Se(1)-C(44) 1.958(10)

O(1)-C(1) 1.221(11)

N(1)-C(1) 1.365(12)

N(1)-C(35) 1.427(12)

Bond Angles (deg)

C(3)-Se(1)-C(44) 97.7(4)

C(41)-N(2)-C(42) 116.0(10)

O(1)-C(1)-N(1) 123.6(11)

O(1)-C(1)-C(2) 118.0(11)

N(1)-C(1)-C(2) 118.3(9)

## J. References:

1. Bruker (2015). *APEX3 and SAINT*. Bruker–Nonius AXS Inc., Madison, Wisconsin, USA.
2. G. M. Sheldrick, SHELXTL Version 2014/7.  
<http://shelx.uni-ac.gwdg.de/SHELX/index.php>.
3. B. Klaus, *Diamond*, Version 3.2; University of Bonn: Germany, 1999.
4. J. Singh, M. Deb and A. J. Elias, *Organometallics*, 2015, **34**, 4946.
5. CCDC 1579963, 1523199-1523208 contain the supplementary crystallographic data for this paper. The data can be obtained free of charge from The Cambridge Crystallographic Data Centre via [www.ccdc.cam.ac.uk/structures](http://www.ccdc.cam.ac.uk/structures)
